# Supplementary material for: Dengue virus 4/2 envelope domain chimeric virus panel maps type-specific responses against dengue serotype 2
Source: PubMed Central journal article supplement (PMC10653845; doi:10.1128/mbio.00818-23), 2023-10-06
Supplement: mbio.00818-23-s0001.pdf [file mbio.00818-23-s0001.pdf]

|               | prM |   |    |    |    |    |    |    |    |    |    |    |    |    |    |    |    |    |    |    |    |    |    |    |    |    |  |  |
|---------------|-----|---|----|----|----|----|----|----|----|----|----|----|----|----|----|----|----|----|----|----|----|----|----|----|----|----|--|--|
|               | 4   | 7 | 11 | 15 | 16 | 17 | 19 | 21 | 22 | 28 | 29 | 31 | 33 | 37 | 44 | 49 | 52 | 57 | 58 | 59 | 70 | 76 | 82 | 83 | 86 | 89 |  |  |
| DENV4         | S   | D | L  | A  | K  | H  | R  | R  | P  | T  | E  | I  | K  | I  | M  | V  | K  | V  | N  | T  | L  | M  | Q  | S  | R  | E  |  |  |
| DENV2         | T   | N | H  | S  | R  | Q  | K  | K  | S  | E  | D  | V  | M  | M  | L  | I  | N  | R  | Q  | N  | S  | T  | T  | T  | H  | E  |  |  |
| DENV4/2 EDI   | S   | D | L  | A  | K  | H  | R  | R  | P  | T  | E  | I  | K  | I  | M  | V  | K  | V  | N  | T  | L  | M  | Q  | S  | R  | E  |  |  |
| DENV4/2 EDII  | T   | N | H  | S  | R  | Q  | K  | K  | S  | E  | D  | V  | M  | M  | L  | I  | N  | R  | Q  | N  | S  | T  | T  | T  | H  | G  |  |  |
| DENV4/2 EDIII | S   | D | L  | A  | K  | H  | R  | R  | P  | T  | E  | I  | K  | I  | M  | V  | K  | V  | N  | T  | L  | M  | Q  | S  | R  | E  |  |  |

|               | M  |    |     |     |     |     |     |     |     |     |     |     |     |     |     |     |     |     |     |     |     |     |     |     |     |
|---------------|----|----|-----|-----|-----|-----|-----|-----|-----|-----|-----|-----|-----|-----|-----|-----|-----|-----|-----|-----|-----|-----|-----|-----|-----|
|               | 96 | 99 | 107 | 123 | 125 | 130 | 134 | 135 | 136 | 138 | 139 | 140 | 143 | 146 | 148 | 149 | 152 | 153 | 154 | 156 | 158 | 159 | 160 | 165 | 166 |
| DENV4         | T  | S  | A   | V   | S   | N   | A   | L   | L   | G   | F   | M   | M   | Q   | G   | I   | T   | V   | F   | V   | M   | M   | L   | Y   | G   |
| DENV2         | V  | V  | T   | I   | T   | H   | T   | I   | M   | A   | I   | L   | T   | T   | H   | F   | A   | L   | I   | I   | L   | T   | A   | M   | T   |
| DENV4/2 EDI   | T  | S  | A   | V   | S   | N   | A   | L   | L   | G   | F   | M   | M   | Q   | G   | I   | T   | V   | F   | V   | M   | M   | L   | Y   | G   |
| DENV4/2 EDII  | V  | V  | T   | V   | S   | N   | A   | L   | L   | G   | F   | M   | M   | Q   | G   | I   | T   | V   | F   | V   | M   | M   | L   | Y   | G   |
| DENV4/2 EDIII | T  | S  | A   | V   | S   | N   | A   | L   | L   | G   | F   | M   | M   | Q   | G   | I   | T   | V   | F   | V   | M   | M   | L   | Y   | G   |

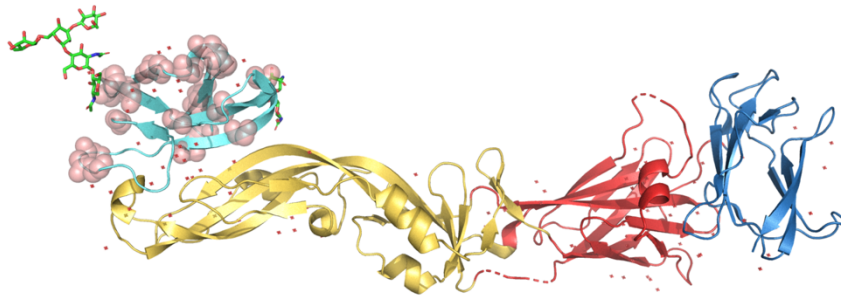

**Supplemental Figure 1.** DENV4/2-EDII includes a chimeric prM. Residues 1-107 of prM were changed to DENV2. Residues 108-192 remained DENV4. Residue E89G was not shared by DENV4 and DENV2.

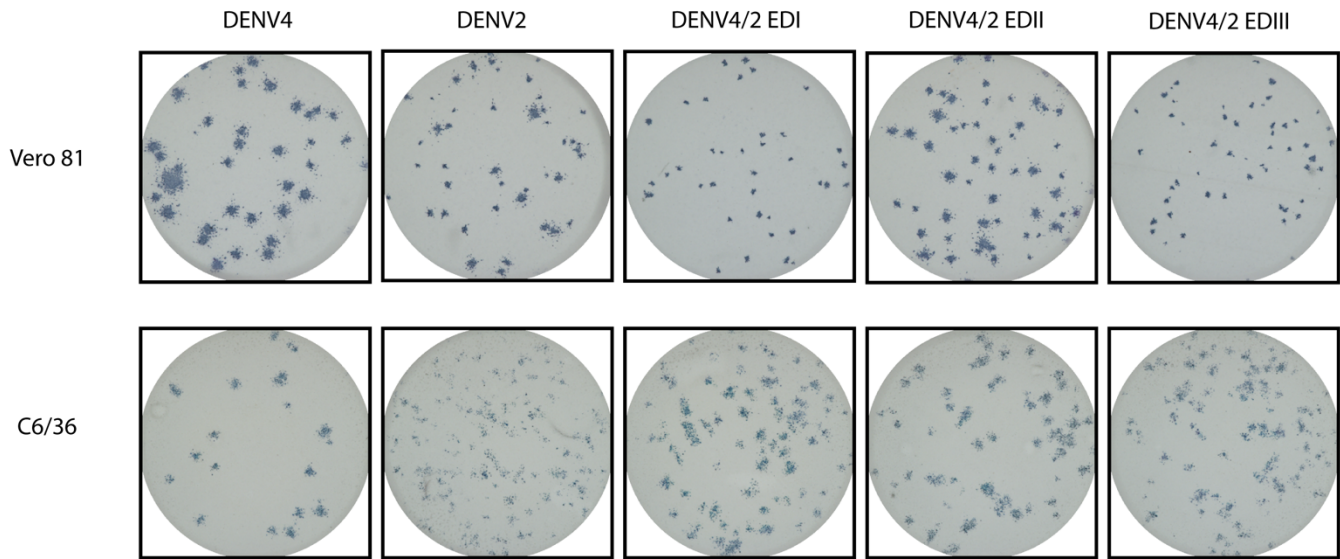

**Supplemental Figure 2.** Foci of viruses on Vero 81 and C6/36 cells after 48 hours incubation at 37°C and 32°C, respectively.

**Supplemental Table 1.** Genome copy number per focus-forming unit of mature and immature stocks with RNase treatment.

| Sample        | Cell Culture | Genome copies/mL | FFU/mL   | Genome copies/titer |
|---------------|--------------|------------------|----------|---------------------|
| DENV4/2-EDI   | Vero81       | 3.45E+10         | 1.53E+06 | 2.25E+04            |
|               | Vero-furin   | 7.50E+09         | 7.50E+05 | 1.00E+04            |
| DENV4/2-EDII  | Vero81       | 4.68E+09         | 1.93E+06 | 2.42E+03            |
|               | Vero-furin   | 8.70E+07         | 1.57E+05 | 5.54E+02            |
| DENV4/2-EDIII | Vero81       | 3.01E+09         | 1.17E+05 | 2.57E+04            |
|               | Vero-furin   | 1.13E+09         | 4.80E+05 | 2.35E+03            |

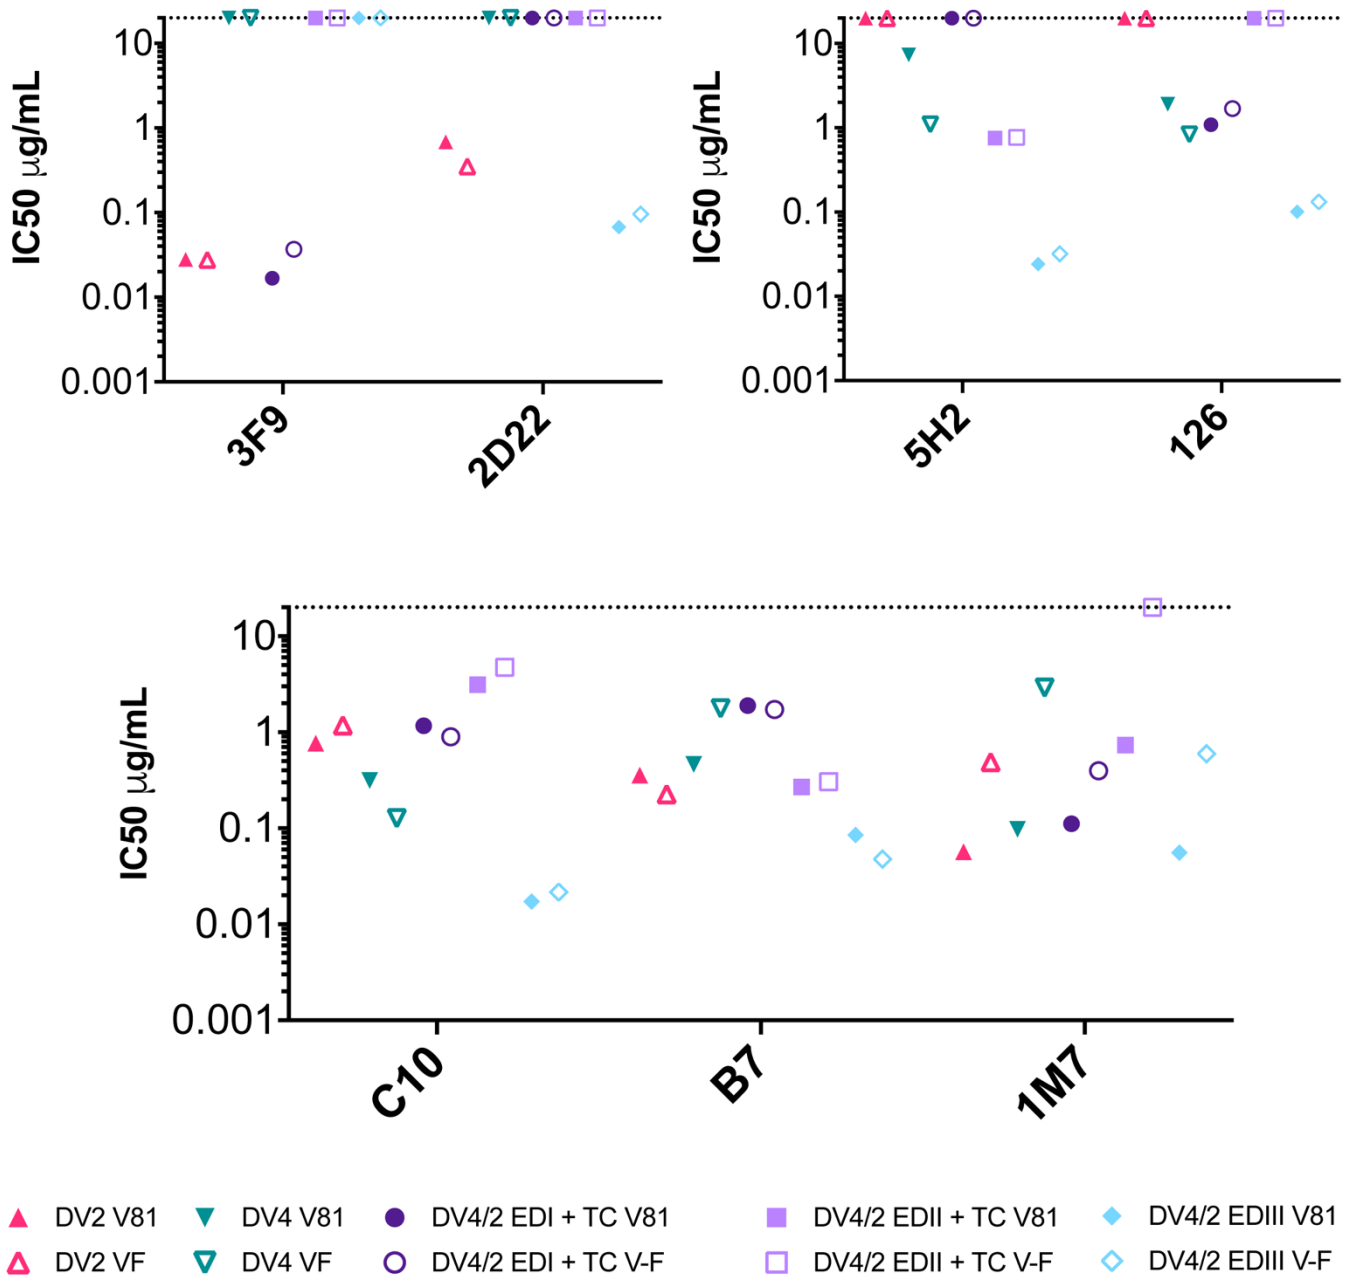

**Supplemental Figure 3.** FRNT of DENV4/2 ED panel comparing neutralization of partially mature (solid shapes) and mature stocks (empty shapes) by **A**) DENV2 (3F9 and 2D22) **B**) DENV4 (5H2 and 126), **C**) cross-reactive (C10, B7, and 1M7), DENV1 (1F4) and DENV3 (5J7) antibodies.

**Supplemental Table 2.** Origin and infection history of convalescent samples

| Sample Number | Infection History                    | Year of Infection | Location                  | Time of collection              |
|---------------|--------------------------------------|-------------------|---------------------------|---------------------------------|
| DT156         | DENV1 natural infection              | 1983; 1997        | Sri Lanka; Northern India | >15 years after first infection |
| DT145         | DENV1 natural infection              | 2006              | Ecuador                   | 8 years after infection         |
| DT147         | DENV1 natural infection              | 2012              | Trinidad, Bolivia         | 2 years after infection         |
| DT001         | DENV2 natural infection              | 2009              | Sri Lanka                 | 9 years after infection         |
| DT110         | DENV2 natural infection              | 1998              | Kuala Lumpur              | 10 years after infection        |
| DT242         | DENV2 natural infection              | 2014              | Brazil                    | >2 years                        |
| 465           | DENV2 natural infection              | 2019              | SE Asia                   | >1 year                         |
| 1207          | DENV2 natural infection              | 2019              | SE Asia                   | >1 year                         |
| 1707          | DENV2 natural infection              | 2019              | SE Asia                   | >1 year                         |
| 1737          | DENV2 natural infection              | 2019              | SE Asia                   | >1 year                         |
| 1892          | DENV2 natural infection              | 2019              | SE Asia                   | >1 year                         |
| 1996          | DENV2 natural infection              | 2019              | SE Asia                   | >1 year                         |
| 2199          | DENV2 natural infection              | 2019              | SE Asia                   | >1 year                         |
| 2396          | DENV2 natural infection              | 2019              | SE Asia                   | >1 year                         |
| 2599          | DENV2 natural infection              | 2019              | SE Asia                   | >1 year                         |
| 2744          | DENV2 natural infection              | 2019              | SE Asia                   | >1 year                         |
| 002           | DENV2 Tonga'74<br>rDEN2Δ30 Challenge | -                 | -                         | 180 days after infection        |
| 006           | DENV2 Tonga'74<br>rDEN2Δ30 Challenge | -                 | -                         | 180 days after infection        |
| 007           | DENV2 Tonga'74<br>rDEN2Δ30 Challenge | -                 | -                         | 180 days after infection        |
| 008           | DENV2 Tonga'74<br>rDEN2Δ30 Challenge | -                 | -                         | 180 days after infection        |
| 009           | DENV2 Tonga'74<br>rDEN2Δ30 Challenge | -                 | -                         | 180 days after infection        |
| 010           | DENV2 Tonga'74<br>rDEN2Δ30 Challenge | -                 | -                         | 180 days after infection        |
| 011           | DENV2 Tonga'74<br>rDEN2Δ30 Challenge | -                 | -                         | 180 days after infection        |
| 013           | DENV2 Tonga'74<br>rDEN2Δ30 Challenge | -                 | -                         | 180 days after infection        |

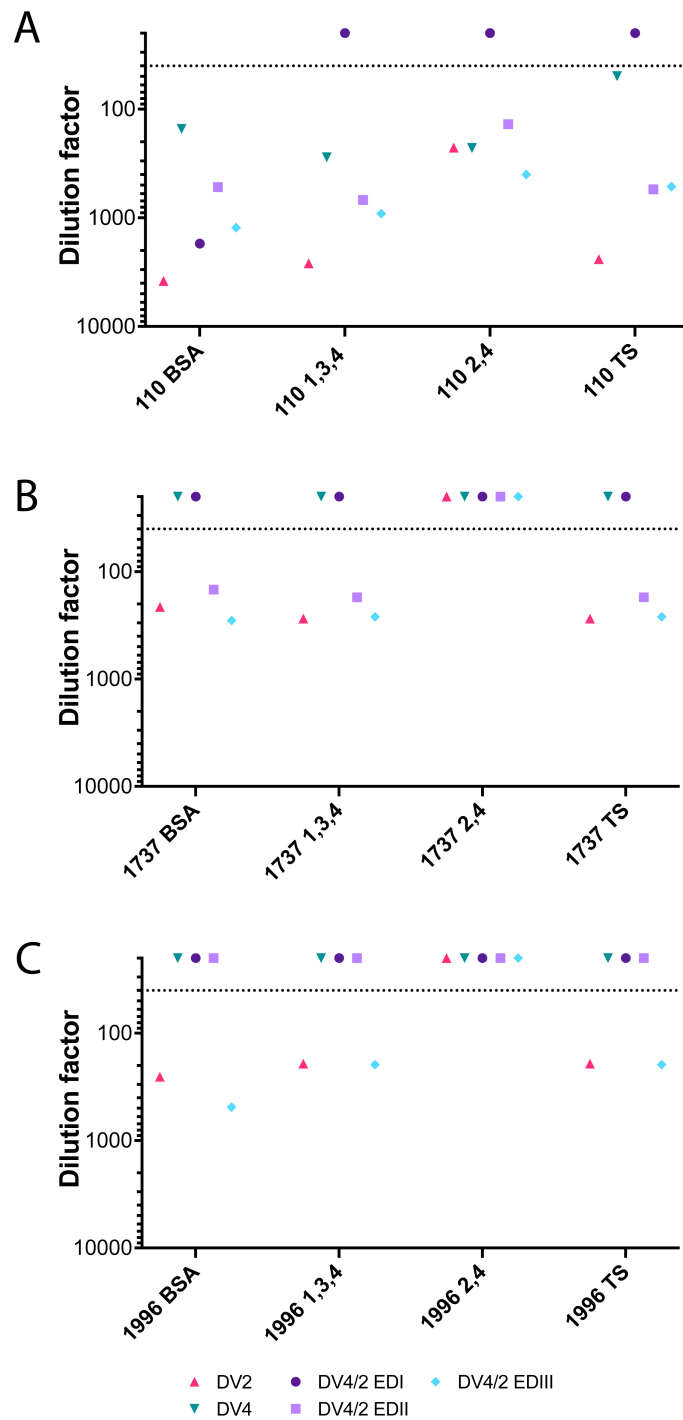

**Supplemental Figure 4.** FRNT of DENV4/2 ED chimeric viruses by three convalescent DENV2 samples, Panel A. 110, Panel B. 1737, Panel C. 1996 depleted by BSA control, heterotypic condition DENV1, DENV3, and DENV4, and homotypic condition DENV2 and DENV4. The type-specific (TS) antibody response is the difference between the IC50 of the heterotypic and homotypic conditions. Samples that did not neutralize were given the value of 10, below the limit of detection, 40.

**Supplemental Table 3.** Calculation of TS response from depleted primary DENV2 natural infection sera. “-“ indicates sample did not neutralize the virus

| Sample | Virus         | IC <sub>50</sub> Control Depletion | IC <sub>50</sub> Heterologous Depletion | IC <sub>50</sub> Homologous Depletion | IC <sub>50</sub> TS response* | % TS <sup>+</sup> |
|--------|---------------|------------------------------------|-----------------------------------------|---------------------------------------|-------------------------------|-------------------|
| DT110  | DENV2         | 4481.5                             | 33560                                   | 412.8                                 | 2943.2                        | 65.7%             |
| 1737   |               | 213                                | 273.5                                   | -                                     | 273.5                         | 100%              |
| 1996   |               | 254                                | 192.3                                   | -                                     | 192.3                         | 75.7%             |
| DT110  | DENV4         | 263.9                              | 513.9                                   | 414.7                                 | 99.2                          | 37.6%             |
| 1737   |               | -                                  | -                                       | -                                     | -                             | 0%                |
| 1996   |               | -                                  | -                                       | -                                     | -                             | 0%                |
| DT110  | DENV4/2-EDI   | 3420.4                             | -                                       | -                                     | -                             | 0%                |
| 1737   |               | -                                  | -                                       | -                                     | -                             | 0%                |
| 1996   |               | -                                  | -                                       | -                                     | -                             | 0%                |
| DT110  | DENV4/2-EDII  | 1003.0                             | 1033.8                                  | 234.7                                 | 799.1                         | 79.7%             |
| 1737   |               | 146.8                              | 173.2                                   | -                                     | 173.2                         | 100%              |
| 1996   |               | -                                  | -                                       | -                                     | -                             | 0%                |
| DT110  | DENV4/2-EDIII | 1611.0                             | 1454.4                                  | 730.2                                 | 724.2                         | 45.0%             |
| 1737   |               | 284.6                              | 262.8                                   | -                                     | 262.8                         | 100%              |
| 1996   |               | 488.6                              | 196.1                                   | -                                     | 196.1                         | 40.1%             |

\*TS response is calculated as  $IC_{50}^{heterologous} - IC_{50}^{homologous}$

+ Percent TS response is calculated as  $\frac{IC_{50}^{heterologous} - IC_{50}^{homologous}}{IC_{50}^{control}} \times 100$

A

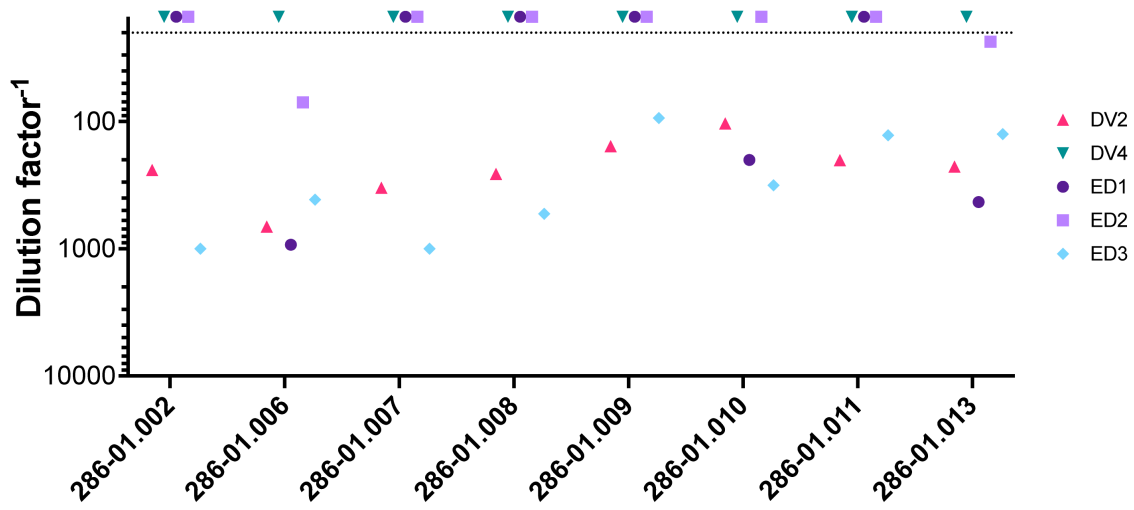

B

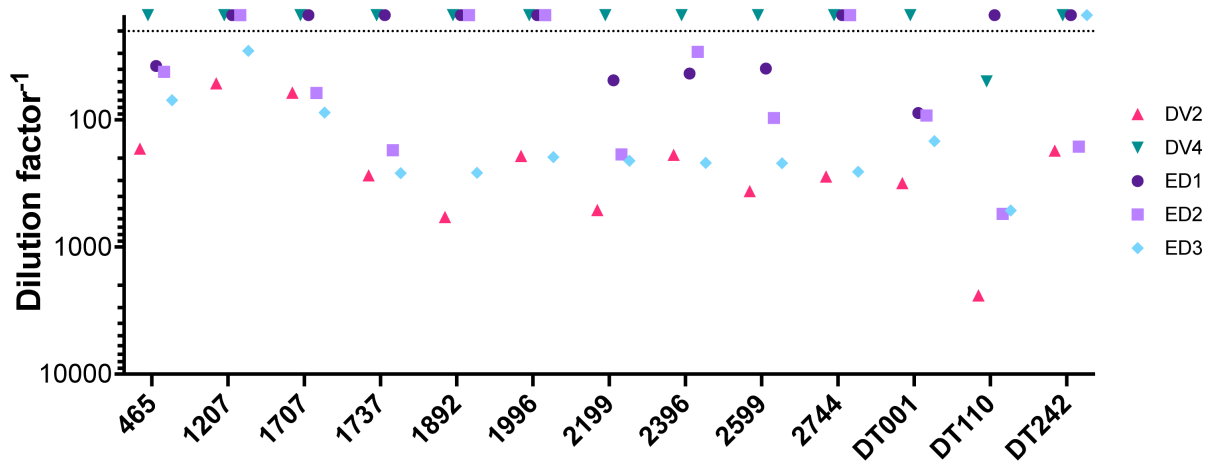

**Supplemental Figure 5.** FRNT of ED panel by convalescent primary DENV2 sera after A) human challenge and B) natural infection.



Supplemental Table 5. Number of individuals from human challenge, natural infection, or all cohorts targeting each envelope domain (ED) and targeting one, two, or three EDs. For example, a sample that neutralized EDII and EDIII is included under EDII, EDIII, and two targets.

| Sample            |    | Domain |      |       | Total number of targets |             |               |
|-------------------|----|--------|------|-------|-------------------------|-------------|---------------|
| Cohort            | N  | EDI    | EDII | EDIII | One target              | Two targets | Three targets |
| Human Challenge   | 8  | 3      | 2    | 8     | 5                       | 1           | 2             |
| Natural Infection | 13 | 5      | 9    | 12    | 5                       | 3           | 5             |
| Total             | 21 | 8      | 11   | 20    | 10                      | 4           | 7             |

Phillipines 2016 Mismatched Residues  
With S16803

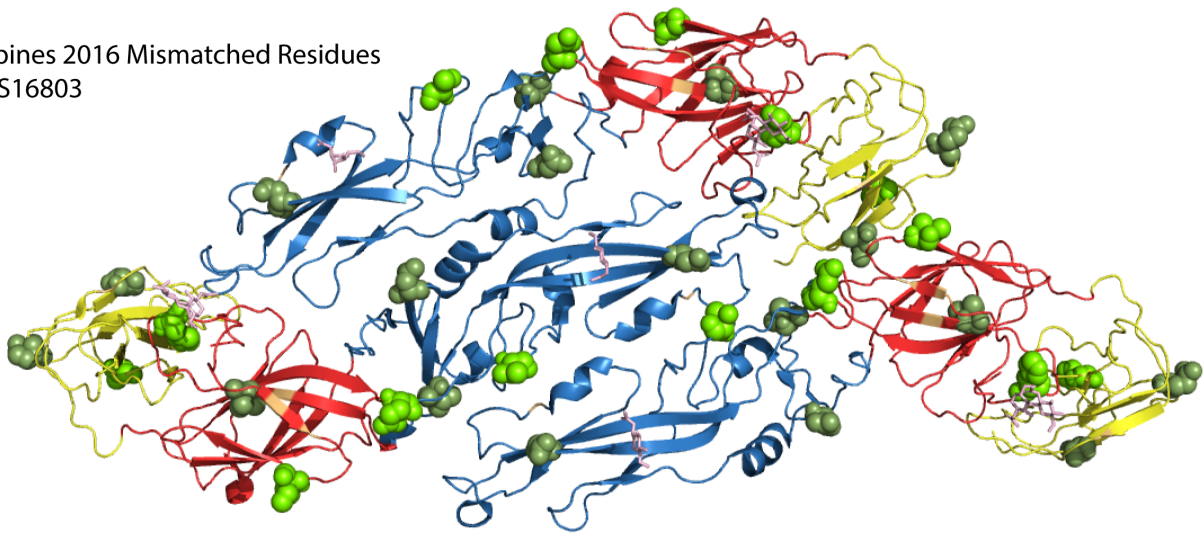

Tonga 74 Mismatched Residues  
With S16803

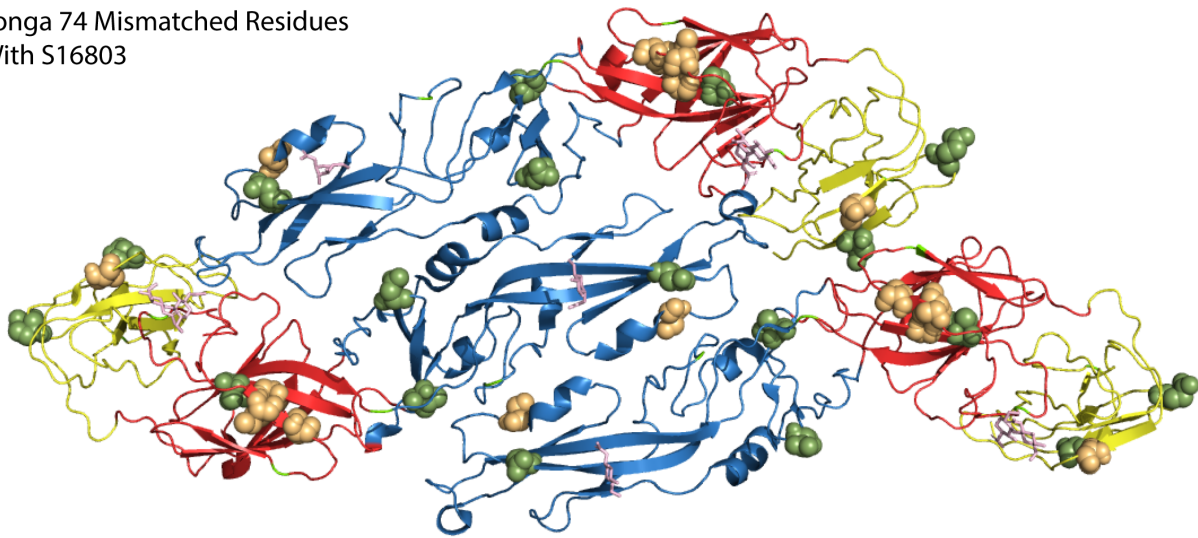

Supplemental Figure 6. Mismatched residues on E between human challenge strain Tonga '74 and representative strain from Southeast Asia. The dark green residues are shared mismatches in both strains. The light green residues are mismatches between S16803 and Phillipines 2016. The beige residues are mismatches between S16803 and Tonga'74.

**Supplemental Table 5.** All primers used in this study.

| Primer name      | Sequence 5'-3'                               |
|------------------|----------------------------------------------|
| DENV4 RT NS1R    | GCCGTCACCTGTGATTTGAC                         |
| DENV2 RT NS1R    | CCACATCAGATTCTCCAGTC                         |
| DENV4 Sanger F   | CGAGAGAAACCGCGTATCAACC                       |
| DENV4 Sanger R   | CGAGAGAAACCGCGTATCAACC                       |
| DENV2 Sanger F   | GAGACGCAGATCTGCAGGC                          |
| DENV2 Sanger R   | TCTGTGATGAAAATCCCACTGCC                      |
| DENV4 qPCR F     | GTTAGCAGTTTCACCACCCC                         |
| DENV4 qPCR R     | AACCTGGGCGTATCATGGAA                         |
| DENV4 qPCR Probe | 56-FAM/ATGAAGCTC/ZEN/CTTCGACAGGC/3IABkFQ     |
| DENV2 qPCR F     | CACATGTGGAACGAGTGC                           |
| DENV2 qPCR R     | TGGGTA ACTTATGGGACTTGTA                      |
| DENV2 qPCR Probe | 56-FAM/ACCACGGGA/ZEN/GAACATAGAAGAGAA/3IABkFQ |
